# Supplementary material
Source: MDPI journal article supplement (https://www.mdpi.com/2077-1312/8/2/76)
Supplement: s1 [file s1]

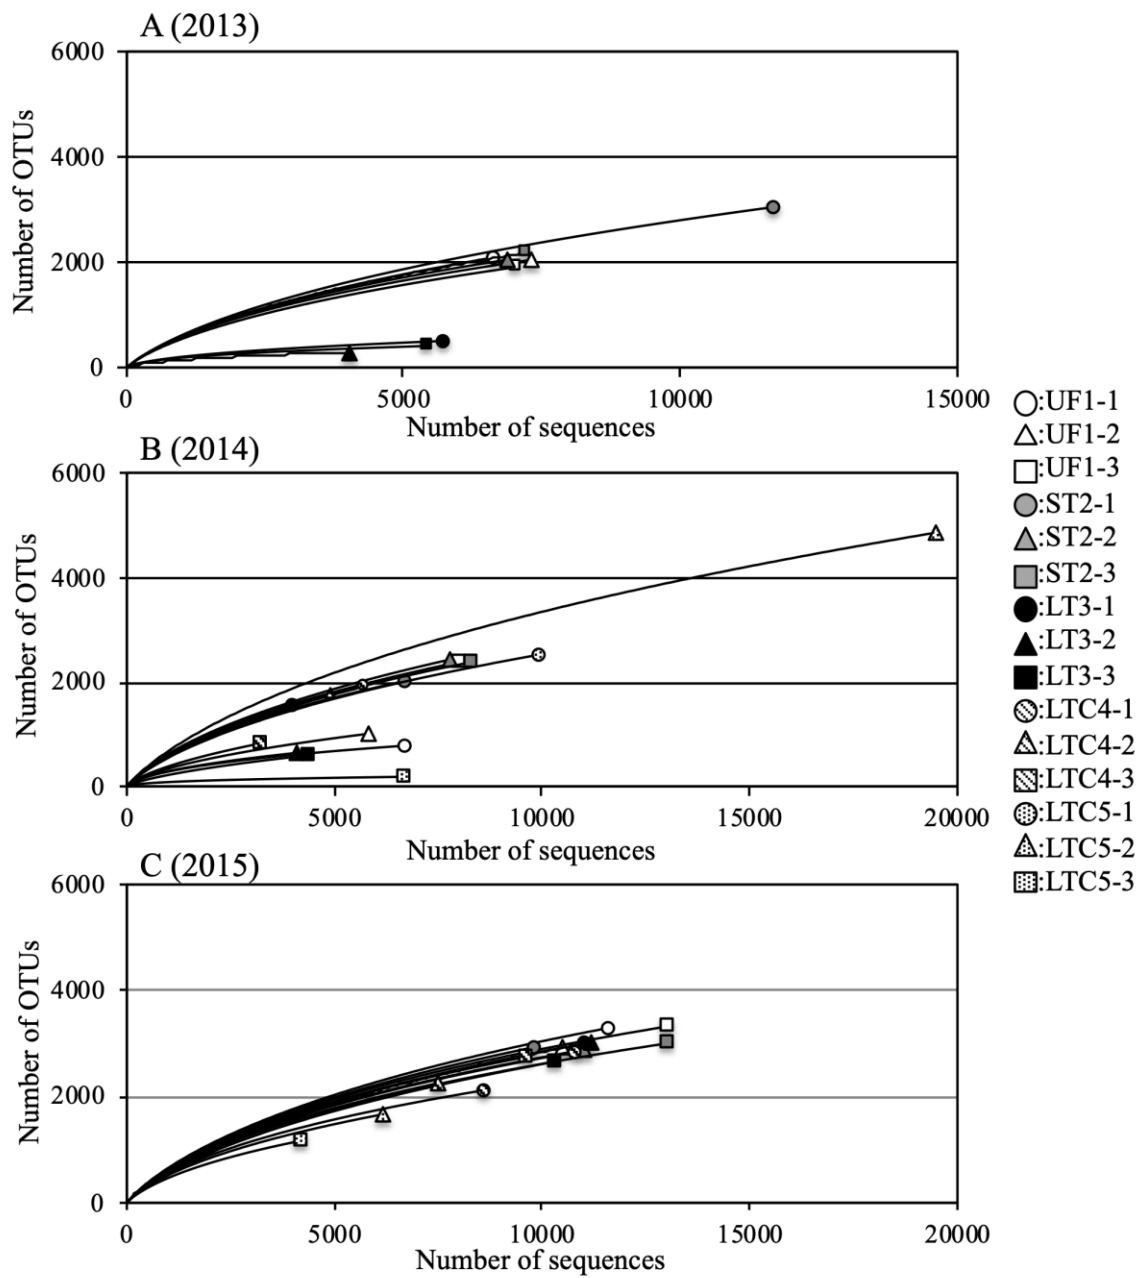

**Figure 1.** Rarefaction curves for the different soil samples calculated from the number of OTUs and sequence for each sample. An OTU consisted of sequences with more than 97% similarity. (a): soil samples in 2013, (b): soil samples in 2014, (c): soil samples in 2015.
